# Supplementary material for: The Efficiency and Safety of Low-Dose Intravenous Indomethacin for Closure of Patent Ductus Arteriosus in Preterm Neonate
Source: Research Square preprint supplement (doi:10.21203/rs.3.rs-7084021/v1), 2025-08-01
Supplement: Supplementary file 1 [file 9985de17f8e6ed636fbd937b.xlsx]

## Sheet: Sheet1
group	GA	Day	BW	male	Dayecho	PDAsize	LA/AO	Hctpre	WBCpre	plateletpre	Bunpre	Crpre	Daignosis	ETT	PDA72	LA/AO	PDAsize72	Hctpost	WBCpost	plateletpost	BUNpost	Crpost	PDA7day	PDAsize7day	Renal impair	Surgery	NEC	Gibleeding	Hospital day	Dead	PDA2course	PDA3course	MedPDA2	MedPDA3
1	27	4	1010	0	6	2.67	1.5	33.4	27000	190000	29	0.59	1	1	1	1.1	0	36.7	22870	171000	27	1.19	1	0	1	0	0	0	145	0	0	0	0	0
1	27	5	1252	1	3	2.8	1.6	38	3230	128000	39	0.91	1	1	0	1.3	0.8	40.2	9020	61000	30	0.77	1	0	0	0	0	0	66	0	0	0	0	0
1	31	5	1300	1	3	2.4	1.5	42.4	3920	225000	25	0.96	1	1	1	1	0	35.8	6590	206000	21	0.69	1	0	0	0	0	0	43	0	0	0	0	0
0	29	4	1105	0	4	2.2	1.5	44.1	4340	123000	7	0.64	1	1	1	1.1	0	39.2	10580	88000	24	0.42	1	0	0	0	0	0	62	0	0	0	0	0
0	30	5	1250	0	5	3.2	2	38.4	4890	211000	36	0.71	1	1	1	1.2	0	31.5	8420	364000	50	1.28	1	0	1	0	0	0	55	0	0	0	0	0
1	31	6	1870	0	4	2.5	1.5	42.1	4750	246000	11	0.42	1	1	1	1	0	38.1	5600	249000	6	0.55	1	0	0	0	0	0	20	0	0	0	0	0
0	29	0	1140	1	3	2	1.5	45.5	7730	287000	31	1	1	1	1	1	0	45	14730	255000	36	0.6	1	0	0	0	0	0	880	0	0	0	0	0
1	29	4	1090	0	2	2	1.9	59.6	8290	111000	20	0.92	1	1	0	1.2	0.8	44.4	6550	91000	32	0.59	0	0.4	0	1	0	0	90	0	0	0	0	0
0	33	2	2150	0	2	2	1.5	44	6680	265000	10	0.81	1	1	1	1.1	0	40.6	9350	294000	16	0.71	1	0	0	0	0	1	222	0	0	0	0	0
0	25	5	720	1	5	2.8	1.8	46.6	10170	342000	33	0.74	1	1	1	1.2	0	30.1	7210	246000	15	0.81	1	0	0	0	0	0	10	1	0	0	0	0
1	28	0	1280	1	3	2.5	1.9	37.3	9320	165000	13	0.77	1	1	1	1	0	37.2	6640	116000	20	0.19	1	0	0	0	0	0	69	0	0	0	0	0
1	30	0	1510	1	2	2.5	1.7	42.1	9330	239000	31	0.92	1	1	0	1	1.25	30.7	11640	303000	16	0.81	1	0	0	0	0	0	42	0	0	0	0	0
1	24	6	750	0	1	2.8	1.5	39.3	9080	269000	31	0.99	1	1	1	1.1	0	34.3	9130	86000	57	0.81	1	0	0	1	0	0	134	0	0	0	0	0
0	26	4	900	1	4	1.87	1.7	40	6440	218000	22	0.77	1	1	1	1.1	0	39.4	11160	214000	50	0.76	1	0	0	0	0	0	106	0	0	0	0	0
0	27	0	1000	1	6	2.5	1.5	39.2	6450	234000	27	0.97	1	1	1	1.1	0	39.4	14260	340000	16	0.68	1	0	0	0	0	0	86	0	0	0	0	0
0	29	4	1360	1	2	1.8	1.6	38.7	10810	260000	16	0.71	1	1	1	1.1	0	36.3	8580	187000	37	0.76	1	0	0	0	0	0	35	0	0	0	0	0
1	30	0	1460	1	2	2	1.56	40	9220	298000	30	0.87	1	1	1	1	0	40	9220	298000	30	0.87	1	0	0	0	0	0	43	0	0	0	0	0
1	32	6	2150	0	4	2.5	2	35.2	12830	238000	11	0.81	1	1	1	1	0	30.2	14320	252000	7	0.81	1	0	0	0	0	0	33	0	0	0	0	0
0	30	6	1300	1	3	2.4	1.6	43.3	11380	374000	19	0.6	1	1	1	1.1	0	48.8	5630	298000	23	0.6	1	0	0	0	0	0	39	0	0	0	0	0
1	29	1	1170	0	4	2.7	1.8	41.7	11570	104000	30	0.87	1	1	0	1.3	1.3	38.9	8790	88000	26	0.65	0	1	0	1	0	0	75	0	0	0	0	0
0	34	0	2197	0	1	3	1.5	48	21800	320000	9	0.99	2	3	1	1.1	0	44.3	20290	410000	13	1.02	1	0	0	0	0	0	42	0	0	0	0	0
1	30	0	1160	1	3	1.9	1.5	43.6	4340	146000	11	0.51	1	1	1	1	0	34.9	6762	76000	17	0.6	1	0	0	0	0	0	52	0	0	0	0	0
1	29	3	1470	1	2	2.6	1.8	48.1	9800	206000	21	0.9	1	1	0	1.2	1	41.7	5720	165000	25	0.73	1	0	0	0	0	0	28	0	0	0	0	0
1	24	5	650	0	3	3	1.9	37.2	9460	245000	22	0.78	1	1	0	1.4	1	36.8	11480	165000	22	0.48	0	1	0	0	0	0	101	0	1	0	1	0
0	25	6	780	0	3	2	1.5	36.3	11080	258000	30	0.86	1	1	1	1	0	37.8	16080	269000	30	0.92	1	0	0	0	0	0	88	0	0	0	0	0
0	28	6	680	0	6	2.2	1.9	46	3650	213000	13	0.76	1	1	1	1.1	0	34.3	5110	160000	29	0.61	1	0	0	0	0	0	86	0	0	0	0	0
0	26	3	870	0	6	2.8	1.6	34	4380	121000	47	1.15	1	1	1	1.1	0	33.5	17130	231000	41	0.64	1	0	0	0	0	0	106	0	0	0	0	0
1	26	1	820	1	3	2.7	1.5	41.5	7190	310000	31	0.92	1	1	1	1.3	0	34	15030	120000	22	0.6	1	0	0	0	0	0	107	0	0	0	0	0
1	28	5	1190	1	3	3.7	1.8	38.9	4673	262000	25	0.85	1	1	1	1.3	0	39.6	6880	245000	35	0.67	1	0	0	0	0	0	51	0	0	0	0	0
0	32	3	2090	1	4	2.8	2	43.3	9400	149000	7	0.77	1	1	0	1	1.2	37.6	10320	279000	6	1.31	0	1.2	1	0	0	0	36	0	0	0	0	0
0	31	6	1640	1	4	2.4	1.5	34.1	6210	140000	19	0.69	1	1	1	1	0	31.6	6760	156000	27	0.65	1	0	0	0	0	0	55	0	0	0	0	0
1	28	4	1150	0	4	1.6	1.5	51.3	7960	241000	32	0.64	1	1	1	1	0	44.5	8700	200000	37	0.87	1	0	0	0	0	0	53	0	0	0	0	0
1	33	6	1930	1	2	2.2	1.67	44.4	10230	150000	15	1.25	1	2	1	1.1	0	43.6	6040	107000	4	0.85	1	0	0	0	0	0	14	0	0	0	0	0
0	32	0	1726	0	6	2.8	1.7	42.2	15770	210000	24	0.58	1	2	1	1	0	37	10380	554000	21	0.35	1	0	0	0	0	0	34	0	0	0	0	0
0	26	0	640	0	1	3.5	1.55	36.8	4730	238000	18	0.69	1	1	1	1	0	40.7	26830	217000	43	0.8	1	0	0	0	0	0	92	0	0	0	0	0
0	32	0	1600	1	2	1.7	1.5	55	31790	366000	17	1	1	1	1	1.1	0	39.3	18720	320000	16	0.92	1	0	0	0	0	0	21	0	0	0	0	0
0	33	2	1770	1	2	2.4	1.5	43.4	5870	235000	15	0.82	1	2	1	1.1	0	42.4	15370	255000	6	0.83	1	0	0	0	0	0	25	0	0	0	0	0
1	26	4	830	1	4	4	1.5	40	3610	122000	25	0.84	1	1	0	1.3	1.7	41	7460	96000	23	0.89	1	0	0	0	0	0	23	0	1	0	1	0
1	32	0	1700	0	1	1.6	1.5	40	13330	298000	12	0.87	1	2	1	1.1	0	36.3	6420	267000	10	0.76	1	0	0	0	0	0	20	0	0	0	0	0
1	29	0	1055	1	1	3.5	1.5	53.3	4690	164000	14	1.04	1	1	1	1	0	43.7	4930	111000	19	0.86	1	0	0	0	0	1	74	0	0	0	0	0
1	30	4	1390	0	2	2	1.4	37.6	5360	297000	23	0.61	1	1	1	1	0	36.2	10780	476000	23	0.51	1	0	0	0	0	0	50	0	0	0	0	0
1	24	6	590	0	2	1.5	1.5	33.3	3780	138000	25	0.71	1	1	0	1	0.6	35.8	21520	90000	54	0.65	0	0.6	1	0	0	0	124	0	0	0	0	0
0	28	0	1070	0	3	3	2	47.9	6550	211000	20	0.64	1	1	1	1	0	39.2	4880	197000	22	0.55	1	0	0	0	0	0	64	0	0	0	0	0
1	27	6	1210	0	2	3	1.66	52.6	11240	102000	20	1.19	1	1	1	1	0	41.4	3610	53000	26	1.12	1	0	0	0	0	0	35	0	0	0	0	0
0	30	4	1300	1	2	3.5	1.5	56	10700	242000	23	0.75	1	1	1	1.1	0	41	7360	161000	35	0.82	1	0	0	0	0	0	59	0	0	0	0	0
1	32	6	2060	1	3	2.2	1.6	46.7	10250	329000	16	0.94	1	1	1	1.3	0	33.4	6240	300000	13	0.87	1	0	0	0	0	0	40	0	0	0	0	0
0	30	3	1410	1	3	3	1.5	41	5650	176000	6	0.77	1	2	0	1.1	0.09	42.6	6610	163000	8	0.84	0	2	0	0	1	0	61	0	0	0	0	0
0	27	4	800	0	2	2.88	1.5	60.9	3900	208000	29	0.97	1	1	0	1.1	0.6	42.5	5270	177000	27	0.78	1	0	0	0	0	0	94	0	0	0	0	0
1	32	0	1780	0	6	2.8	1.6	44.4	6610	372000	5	0.58	3	2	1	1.1	0	41.2	15450	347000	7	0.64	1	0	0	0	0	0	25	0	0	0	0	0
1	29	2	1400	1	1	2.4	1.5	41.7	9640	150000	25	0.97	1	1	1	1.1	0	37.9	18000	93000	36	0.47	1	0	0	0	1	0	62	0	0	0	0	0
0	32	0	1515	0	2	2.7	1.5	57	11180	234000	20	0.79	1	1	1	1.1	0	40	6750	220000	41	0.9	1	0	1	0	1	0	40	0	0	0	0	0
1	28	0	1080	0	6	2	1.5	45	14000	533000	27	1	1	2	1	1.1	0	39	19650	533000	34	0.82	1	0	0	0	0	0	15	0	0	0	0	0
0	32	0	1502	0	3	2.4	1.5	47	10280	303000	21	0.84	2	2	1	1	0	29.8	18060	511000			1	0	0	0	0	0	19	0	0	0	0	0
0	34	0	2280	0	2	2.65	1.5	63	13150	306000	18	0.94	1	1	1	1	0	43.6	10700	252000	24	1.48	1	0	0	0	0	0	11	0	0	0	0	0
1	22	6	690	0	2	3.5	1.6	52.6	4500	230000	38	1.3	1	1	1	1	0	35.9	4000	124000	71	1.92	1	0	1	0	0	0	104	0	0	0	0	0
0	28	3	870	0	6	4.5	1.6	45.4	5730	255000	20	0.89	1	1	0	1	1	41.5	8000	115000	31	0.72	1	0	0	0	0	0	52	0	0	0	0	0
0	28	4	1300	1	1	4	1.5	38.2	8500	312000	13	0.66	1	1	1	1	0	46.5	7910	103000	56	0.84	1	0	0	0	0	0	72	0	0	0	0	0
0	26	4	700	1	2	2	1.54	43.7	4860	152000	40	0.91	1	1	1	1	0	41.2	13770	24000	38	0.75	1	0	0	0	0	0	67	0	0	0	0	0
1	25	4	720	1	3	2	1.5	37.6	6230	134000	50	1	1	1	1	1	0	36	5170	144000	45	0.93	1	0	0	0	0	0	71	0	0	0	0	0
0	24	6	843	0	4	3	1.5	43.4	20660	313000	17	0.65	1	1	1	1	0	41	26120	368000	38	0.37	1	0	0	0	0	0	90	0	0	0	0	0
1	31	1	1610	0	2	3.4	1.5	45.5	11240	264000	29	0.77	1	1	1	1	0	45.3	8550	346000	16	0.71	1	0	0	0	0	0	29	0	0	0	0	0
1	32	3	2242	0	1	2.5	2	46.9	9300	361000	5	0.69	1	1	1	1.1	0	50.7	13030	361000	2	0.53	1	0	0	0	0	0	8	0	0	0	0	0
0	25	0	1275	1	5	3.6	1.6	47.5	6993	136000	38	0.59	1	1	1	1	0	46.8	7710	111000	55	0.66	1	0	0	0	0	0	114	1	0	0	0	0
0	30	2	1120	1	1	2	1.5	53	6320	181000	22	1.1	1	1	1	1	0	39.4	3180	128000	28	1	1	0	0	0	0	0	107	0	0	0	0	0
0	26	1	1030	1	2	3	2	49.9	10930	249000	28	1	1	1	0	1	0.8	35.4	6390	172000	43	0.84	1	0	0	0	0	0	80	0	0	0	0	0
0	28	0	720	0	4	2.5	1.5	47.6	3300	200000	18	0.88	1	1	0	1.2	2.1	34.7	2740	175000	23	0.87	1	0	1	0	1	0	58	0	0	0	0	0
0	33	5	2215	1	1	2.4	1.5	47.8	19740	299000	15	0.57	1	1	1	1	0	35	11500	268000	24	0.83	1	0	0	0	0	0	68	0	0	0	0	0
0	34	0	1790	0	2	1.8	1.5	46.4	7180	206000	18	0.55	1	2	1	1	0	41.8	6640	211000	11	0.48	1	0	0	0	0	0	15	0	0	0	0	0
0	28	3	1180	1	1	5	2	44	9070	220000	38	0.9	1	1	0	1.2	1.2	42.8	10200	263000	76	1.21	1	0	1	0	1	0	68	0	0	0	0	0
1	28	3	1140	1	5	2.2	1.5	44	9620	220000	32	0.78	1	1	1	1	0	51	5780	104000	42	0.88	1	0	0	0	1	0	72	0	0	0	0	0
0	32	4	1852	1	2	4.5	1.5	43	9830	169000	12	0.94	1	1	1	1	0	45	10240	304000	52	1.17	1	0	0	0	0	0	32	0	0	0	0	0
0	27	4	870	1	6	2.4	2	35.3	14270	125000	38	0.93	1	1	0	1.2	0.6	26.4	13280	68000	59	0.8	1	0	0	0	0	0	83	0	0	0	0	0
0	25	0	660	0	4	2.2	1.5	36.6	17000	259000	38	0.79	1	1	1	1.2	0	33.4	24340	289000	25	0.48	1	0	0	0	0	0	93	0	0	0	0	0
1	30	3	840	0	2	2	1.5	42	7700	228000	11	0.3	1	1	1	1	0	45.7	4440	86000	4	0.78	1	0	0	0	0	0	84	0	0	0	0	0
1	26	5	910	0	2	2.2	1.5	43.4	33810	348000	29	1.12	1	1	1	1.2	0	36.9	15420	400000	46	1.46	1	0	1	0	0	0	94	0	0	0	0	0
1	31	0	1722	0	4	2.5	1.5	46	9530	363000	2	0.61	1	2	1	1.1	0	38.6	12950	284000	4	0.67	1	0	0	0	0	0	17	0	0	0	0	0
0	28	2	1148	1	4	2.5	2	45.2	16700	418000	20	0.56	1	2	0	1.2	2	33.4	18000	424000	26	0.52	1	0	0	0	0	1	59	0	0	0	0	0
1	27	4	1260	1	4	4	1.7	42.4	6840	149000	53	0.66	1	1	1	1.46	0	40.6	10160	173000	64	0.79	1	0	0	0	0	0	71	0	0	0	0	0
1	30	2	1870	1	4	3	1.9	41.2	9010	155000	42	0.7	1	1	1	1	0	37.7	12410	192000	57	1.01	1	0	0	0	0	0	28	0	0	0	0	0
0	34	0	1380	0	5	3	1.7	41.6	14760	217000	13	0.57	1	1	0	1.19	0.8	38.3	14050	245000	30	0.51	1	0	0	0	0	0	27	0	0	0	0	0
0	29	1	1520	0	1	2.6	1.54	38.8	11040	255000	13	0.71	1	1	1	1	0	44.2	4430	144000	26	0.94	1	0	0	0	0	0	48	0	0	0	0	0
0	27	0	1110	0	1	2	1.4	38.7	5230	223000	25	0.9	1	1	1	1.19	0	40	6250	124000	33	1.07	1	0	0	0	0	0	77	0	0	0	0	0
0	29	0	1210	0	4	2.3	1.4	43.2	5930	298000	31	0.84	1	1	1	1.1	0	42	7390	320000	46	0.95	1	0	0	0	0	0	40	0	0	0	0	0
1	28	6	1480	1	2	2.7	1.5	37	6860	126000	21	0.93	1	1	1	1	0	50.7	6650	165000	26	1.01	1	0	0	0	1	0	101	0	0	0	0	0
1	28	6	840	1	2	2.8	1.9	50	8120	145000	10	0.94	1	1	1	1	0	40.4	6720	73000	16	0.76	1	0	0	0	0	0	159	1	0	0	0	0
1	32	1	1310	1	3	3.5	2	44	4920	222000	28	1.06	1	1	1	1	0	38	5820	155000	52	0.97	1	0	0	0	0	0	29	0	0	0	0	0
1	34	0	2420	1	3	2.8	1.4	42.2	14150	211000	13	0.7	1	1	1	1.1	0	36.1	8690	227000	21	0.55	1	0	0	0	0	0	18	0	0	0	0	0
0	28	6	1130	0	3	2.5	1.4	40.3	64950	139000	31	0.72	1	1	1	1	0	47.6	43640	106000	39	0.51	1	0	0	0	0	0	153	0	0	0	0	0
1	26	2	520	1	3	3.5	1.5	39.8	3860	119000	12	0.77	1	1	1	1.1	0	38.6	2680	169000	12	0.62	1	0	0	0	0	0	87	0	0	0	0	0
1	29	5	1020	0	2	1.8	1.4	52	7890	156000	10	0.61	1	1	1	1	0	47.7	8830	220000	10	0.59	1	0	0	0	0	1	43	0	0	0	0	0
1	29	2	1310	1	3	2	1.42	40.3	11480	158000	14	0.72	1	1	1	1	0	43.4	6090	187000	24	0.85	1	0	0	0	0	0	75	0	0	0	0	0
0	29	0	1170	1	3	4	1.6	39.8	10440	301000	33	0.75	1	1	0	1.2	2	35.9	14750	177000	31	0.76	1	0	0	0	0	0	108	0	0	0	0	0
0	27	6	990	0	2	1.5	1.7	41.4	40000	200000	26	0.77	1	1	1	1.1	0	35.2	20810	65000	41	0.83	1	0	0	0	0	0	70	0	0	0	0	0
0	26	0	850	0	4	1.8	1.4	34.8	8150	231000	27	0.91	1	1	1	1	0	35	4350	91000	35	0.97	1	0	0	0	0	0	110	0	0	0	0	0
1	28	2	710	1	3	1.7	1.4	37.5	4810	152000	11	0.4	1	1	1	1.1	0	41.1	3470	83000	10	0.69	1	0	0	0	0	0	78	0	0	0	0	0
1	28	2	1130	0	4	2.7	1.4	43	31720	332000	27	0.65	1	1	1	1.1	0	41.8	22170	404000	31	0.82	1	0	0	0	0	0	63	0	0	0	0	0
1	28	0	1080	1	2	2	1.6	38.8	23010	318000	19	0.82	1	2	1	1	0	43.9	16260	337000	16	0.78	1	0	0	0	0	0	68	0	0	0	0	0
1	25	5	750	0	2	1.5	1.4	40	15130	370000	34	1.14	1	1	1	1	0	38.4	14340	221000	42	1.08	1	0	0	0	0	0	23	1	0	0	0	0
0	28	1	1060	1	3	2.4	1.5	43.6	8250	171000	27	0.84	1	1	1	1.1	0	38.5	4930	77000	31	0.8	1	0	0	0	0	0	44	0	0	0	0	0
1	31	1	1420	1	3	3.5	2	51.2	6170	241000	19	0.59	1	2	1	1.1	0	50	10570	161000	22	0.78	1	0	0	0	0	0	36	0	0	0	0	0
0	25	3	740	0	2	4	1.5	47.7	14950	140000	27	0.47	1	1	0	1.1	0.8	42.7	14950	140000	31	0.87	1	0	0	0	0	0	74	0	0	0	0	0
0	25	3	650	0	3	2.9	1.6	37.4	8890	169000	43	1.14	1	1	0	1.1	0.9	41.3	25740	213000	50	0.78	1	0	0	0	1	0	108	0	0	0	0	0
0	30	5	1180	1	3	3.2	1.66	51.5	8400	204000	21	1.1	1	1	1	1.1	0	41.1	3540	137000	16	1.12	1	0	0	0	0	0	51	0	0	0	0	0
0	30	2	1540	1	6	3.5	1.4	41.9	13120	223000	27	0.92	1	1	1	1.1	0	42.2	3960	150000	23	0.56	1	0	0	0	0	0	46	0	0	0	0	0
1	31	0	1230	0	4	3.5	1.5	48.6	5130	308000	48	0.94	1	1	1	1	0	52	11520	103000	36	0.84	1	0	0	0	0	0	49	0	0	0	0	0
1	29	2	1060	1	1	3	1.4	38.8	45880	103000	48	1.49	1	1	1	1.1	0	45.7	21065	138000	36	0.86	1	0	0	0	0	0	72	0	0	0	0	0
0	32	0	1330	1	2	3.6	1.5	44	5620	340000	24	0.73	1	1	1	1	0	44.9	9100	237000	31	0.96	1	0	1	0	0	0	71	0	0	0	0	0
1	29	0	1414	0	4	2	1.5	40.3	8850	421000	28	0.7	1	1	1	1	0	37.8	7750	388000	40	0.8	1	0	0	0	0	0	61	0	0	0	0	0
0	34	0	2240	1	2	2.5	1.4	40.6	18690	147000	11	0.79	1	1	1	1	0	49.7	6580	136000	26	0.82	1	0	0	0	0	0	46	0	0	0	0	0
0	31	4	1430	1	3	2.6	1.4	40	10740	250000	17	0.62	1	1	1	1.1	0	38.7	7750	249000	16	0.75	1	0	0	0	0	0	27	0	0	0	0	0
1	27	1	820	1	6	2.7	1.4	36.2	10250	135000	12	0.56	1	1	0	1	1	33.5	19300	160000	8	0.51	0	2.4	0	0	0	0		0	1	0	1	0
1	31	4	1170	0	2	3	1.4	49.2	4400	235000	24	0.78	1	1	1	1.1	0	42.6	4200	149000	25	0.67	1	0	0	0	0	0	55	0	0	0	0	0
1	29	2	1180	0	2	1.5	1.4	48.6	5800	842000	22	0.58	1	1	0	1.1	0.9	33.4	6530	219000	22	0.57	0	0.5	0	0	0	0		0	0	0	0	0
0	26	4	1130	1	2	1.8	1.4	39.1	13420	324000	30	0.94	1	1	1	1.1	0	37	9740	259000	48	1	1	0	0	0	0	0	49	0	0	0	0	0
1	28	3	1200	1	2	2.6	1.5	35.4	22690	385000	32	0.46	1	1	1	1.1	0	35.4	22690	385000	27	0.64	1	0	0	0	0	0	60	0	0	0	0	0
1	28	0	1100	0	4	5	2	32.9	14900	228000	38	0.85	1	1	0	1.8	2	40.9	6070	110000	30	0.89	0	0.7	0	0	0	0	60	0	1	0	1	0
0	31	4	1850	0	4	2	1.66	44	8860	423000	18	0.52	1	1	1	1.1	0	41.4	9180	357000	25	0.6	1	0	0	0	0	0	27	0	0	0	0	0
0	32	5	1890	0	3	3.2	1.6	47.6	11000	225000	18	0.7	1	1	1	1.1	0	36.6	13660	306000	22	0.81	1	0	0	0	0	0	14	0	0	0	0	0
0	31	2	1560	0	6	4.5	2.3	47.9	4140	215000	18	1.12	1	1	1	1.4	0	39.4	8666	145000	23	0.98	1	0	0	0	0	0	30	0	0	0	0	0
1	27	4	1240	1	2	2	1.6	40.1	9770	291000	23	0.93	1	1	1	1.1	0	38.6	6090	210000	17	0.91	1	0	0	0	1	0	31	0	0	0	0	0
1	24	4	760	0	2	3	1.8	38.1	25900	235000	26	0.88	1	1	1	1	0	33.2	13960	416000	46	1.07	1	0	0	0	0	0		0	0	0	0	0
0	25	6	1090	0	2	3.3	1.6	46.1	6560	350000	27	0.74	1	1	1	1.1	0	37.3	9520	298000	29	0.64	1	0	0	0	0	0	33	0	0	0	0	0
1	28	1	1085	0	3	4	2	39.1	6590	294000	25	0.79	1	1	1	1.1	0	39.1	7590	359000	17	0.65	1	0	0	0	0	0		0
0	28	5	1110	0	1	2.5	1.6	54	5670	269000	25	0.54	1	1	1	1	0	43	2190	154000	21	0.55	1	0	0	0	0	0		0	0	0	0	0
0	28	1	1070	1	1	2.2	1.4	50.9	4090	201000	27	1.13	1	1	1	1	0	38.6	5500	105000	35	1	1	0	0	0	0	1		0	0	0	0	0
1	24	3	770	1	5	2	1.5	38	8400	216000	38	0.82	1	1	0	1	0.5	38.5	4190	200000	36	0.71	0	0.5	0	0	0	0		0	0	0	0	0
1	30	4	1180	0	4	3	1.5	41.5	8970	139000	36	0.57	1	1	1	1.1	0	34.2	9300	173000	26	0.41	1	0	0	0	0	0		0	0	0	0	0
1	30	3	1390	1	2	3.7	1.8	40.2	3100	152000	24	0.86	1	1	0	1.1	0	32.4	5250	201000	28	0.75	1	0	0	0	0	0		0	0	0	0	0

## Sheet: Sheet2
PDA 72	0= no	1=close
PDA 7 day	0= no	1= close
Renal impair	0=no	1= impair
male	0=female	1-male
Diagnosis	1= RDS
MedPDA2	1 indomethacin		2=brufen		3=paracetamol		0=NO
PDA2course	0=no	1=yes
